# Supplementary material
Source: Springer Nature journal article supplement (https://www.springermedizin.de/resource/supplementary/12916_2012_605_MOESM6_ESM.pdf/9597970)

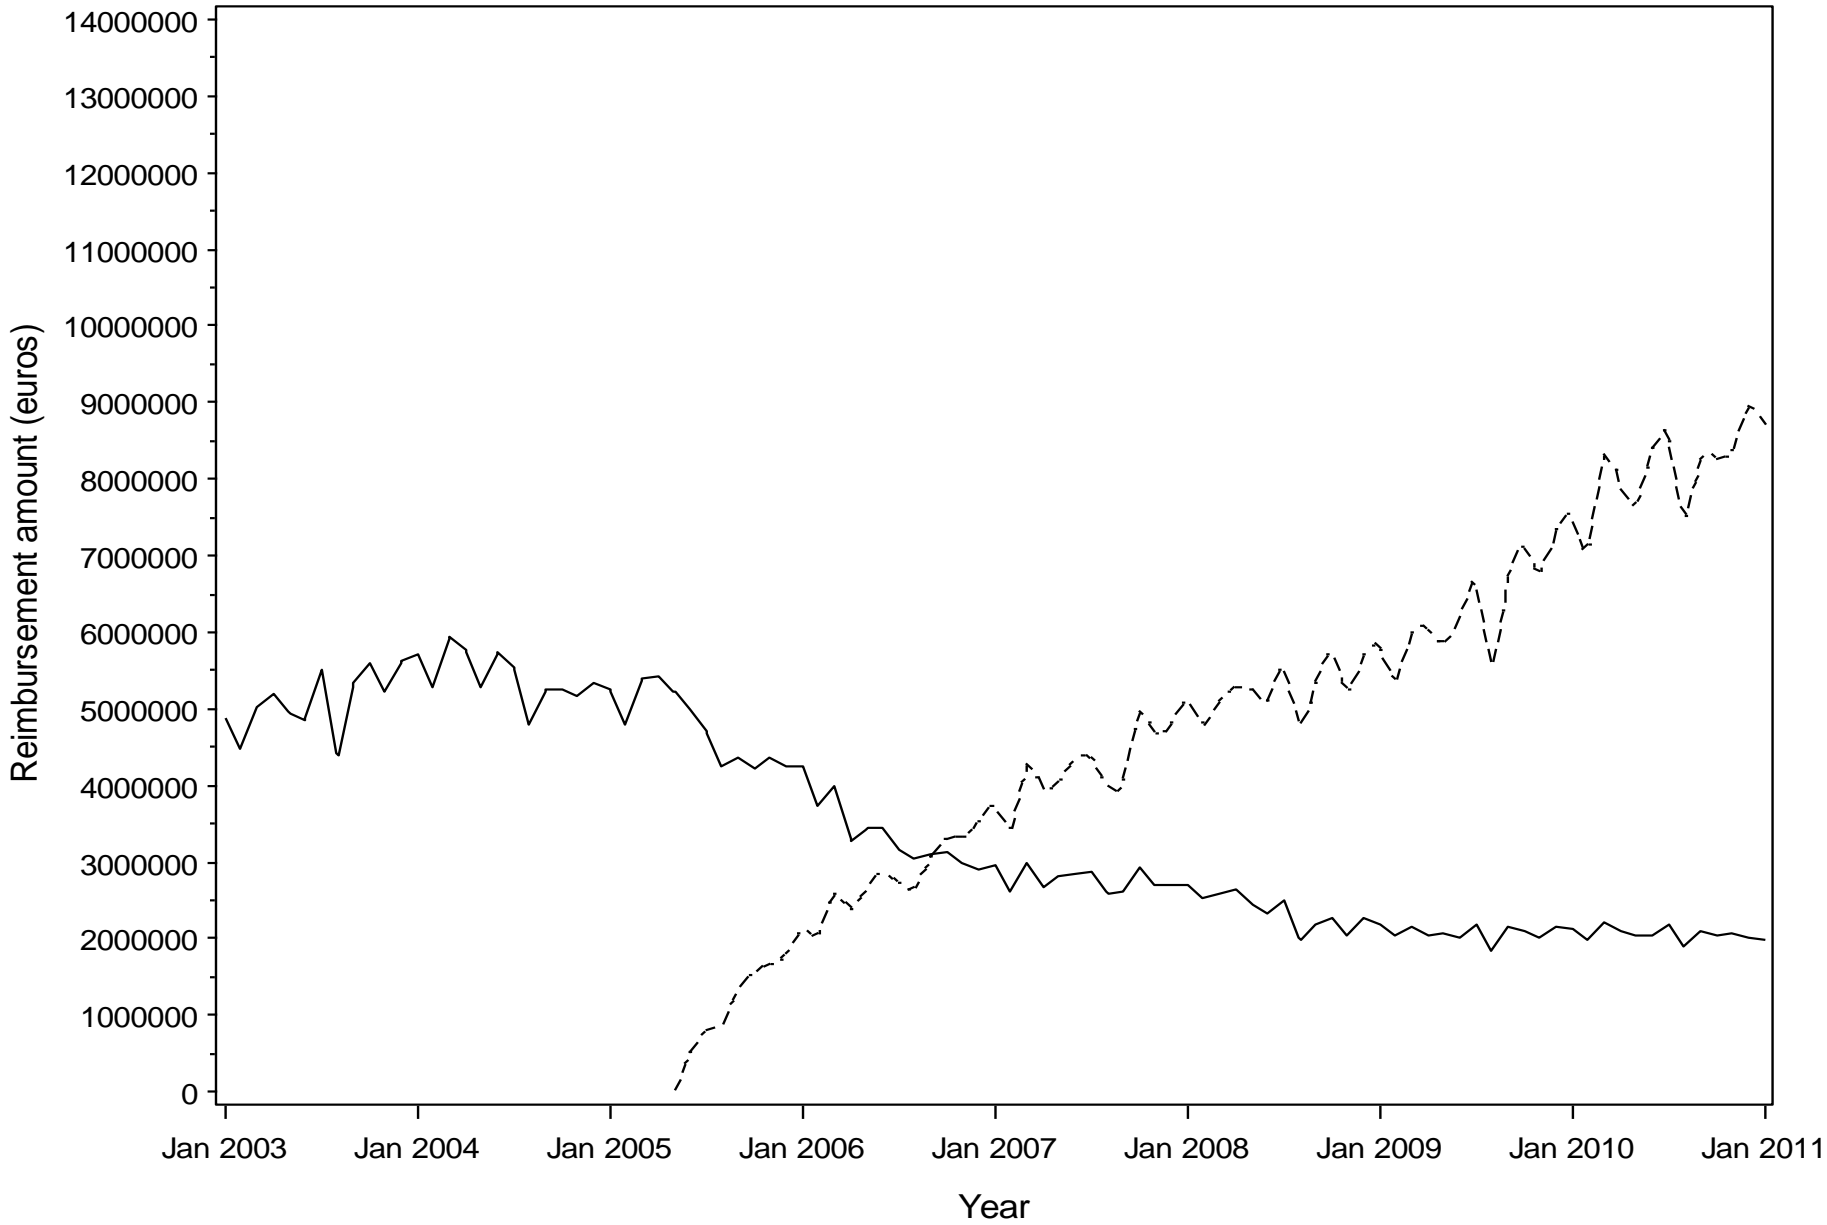

— CITALOPRAM (AND GENERIC DRUGS)    - - - - ESCITALOPRAM

Supplement: MOESM6 [file 9597970]
